# Supplementary material for: Household coverage of vitamin A fortification of edible oil in Bangladesh
Source: PubMed Central journal article supplement (PMC6447147; doi:10.1371/journal.pone.0212257), 2019-04-03
Supplement: pone.0212257.s001.pdf [file pone.0212257.s001.pdf]

**Household QUESTIONNAIRE**

Date : |\_|\_|. |\_|\_|. |\_|\_|\_|\_|\_|

PSU ID: PSU identifier: |\_|\_|\_|

PSU NAME: Name of village / town / quarter / block:-----

HH ID: Household identifier: |\_|\_|

IN ID: Interviewer identifier: |\_|\_|\_|

|                |                                        |                                                     |       |
|----------------|----------------------------------------|-----------------------------------------------------|-------|
| <b>CONSENT</b> | <i>Was household consent obtained?</i> | 01=Yes<br>02 = Refusal<br>03= Occupants not present | [ _ ] |
|----------------|----------------------------------------|-----------------------------------------------------|-------|

**Request an interview with the following person (in order of preference)**  
*RC1: The person mainly responsible for cooking in the household (minimum age limit 15 years).*  
*RC2: A woman of reproductive age (15-49 years) present at the time of the visit.*  
*RC3: Another adult household member present at the time of the visit (minimum age limit 18 years).*

|                                                                                                                          |                          |            |                          |
|--------------------------------------------------------------------------------------------------------------------------|--------------------------|------------|--------------------------|
| <b>Category of the respondent (arranged in order of preference)</b><br><i>Select the respondent category with an "v"</i> |                          |            |                          |
| <b>RC1</b>                                                                                                               | <input type="checkbox"/> | <b>RC2</b> | <input type="checkbox"/> |
| <b>RC3</b>                                                                                                               | <input type="checkbox"/> |            |                          |

**IN: (Interviewee Sex, Age and Education)**

|            | QUESTION      | CODING CATEGORIES                                                                                                                                                          | CODE                                              |
|------------|---------------|----------------------------------------------------------------------------------------------------------------------------------------------------------------------------|---------------------------------------------------|
| <b>IN1</b> | Name<br>----- | Mobile Number<br><br><div style="border: 1px solid black; width: 100%; height: 15px; margin-bottom: 5px;"></div> Name:-----<br><br>Relation of phone owner with respondent |                                                   |
| <b>IN2</b> | Sex (M/F)     | Male.....01<br>Female.....02                                                                                                                                               | <input type="checkbox"/> <input type="checkbox"/> |

|            |                                           |                                                                                                                          |                                                     |
|------------|-------------------------------------------|--------------------------------------------------------------------------------------------------------------------------|-----------------------------------------------------|
|            |                                           |                                                                                                                          |                                                     |
| <b>IN3</b> | Age (years)                               | Complete years                                                                                                           | <input type="text"/> <input type="text"/>           |
| <b>IN4</b> | Have you ever attended school or college? | Yes.....01<br>No.....02                                                                                                  | <input type="text"/> <input type="text"/><br>02⇒HH1 |
| <b>IN5</b> | How many years of education did you have? | <5 years.....01<br>5-10 years.....02<br>SSC.....03<br>HSC.....04<br>Graduation.....05<br>Masters.....06<br>Others.....07 | <input type="text"/> <input type="text"/>           |
| <b>IN6</b> | Currently attending school or college?    | Yes.....01<br>No.....02                                                                                                  | <input type="text"/> <input type="text"/>           |

### Household Members Information

*FOR INTERVIEWER USE ONLY*

**Household member definition:**

*One person living alone, or a group of people (not necessarily related) living at the same address with common housekeeping (sharing either a living room or sitting room, or at least one meal a day)*

|                                           | QUESTION                                                  | CODING CATEGORIES                               | CODE                                      |
|-------------------------------------------|-----------------------------------------------------------|-------------------------------------------------|-------------------------------------------|
| <b>HH1</b>                                | How many people live in this household?                   | -----Person                                     | <input type="text"/> <input type="text"/> |
|                                           |                                                           | Go to SBH1 if HH1 =1                            |                                           |
| <b>HH2</b>                                | How many household members are male?                      | -----Person                                     | <input type="text"/> <input type="text"/> |
|                                           |                                                           | If there is no male member in this HH go to HH3 |                                           |
| How old are the <HH2> males in the house? |                                                           |                                                 |                                           |
| <b>HH2a</b>                               | 0-11 months (<1 year)                                     | -----Person                                     | <input type="text"/> <input type="text"/> |
| <b>HH2b</b>                               | 12-23 months (1-< 2 years)                                | -----Person                                     | <input type="text"/> <input type="text"/> |
| <b>HH2c</b>                               | 24-59 months (2-<5 years)                                 | -----Person                                     | <input type="text"/> <input type="text"/> |
| <b>HH2d</b>                               | 5 to 14 years                                             | -----Person                                     | <input type="text"/> <input type="text"/> |
| <b>HH2e</b>                               | 15 to 19 years                                            | -----Person                                     | <input type="text"/> <input type="text"/> |
| <b>HH2f</b>                               | 20 to 49 years                                            | -----Person                                     | <input type="text"/> <input type="text"/> |
| <b>HH2g</b>                               | 50 years or more                                          | -----Person                                     | <input type="text"/> <input type="text"/> |
| <b>HH3</b>                                | Confirm that there are (HH1-HH2) females in the household | ----- Person                                    | <input type="text"/> <input type="text"/> |

|                                             | QUESTION                   | CODING CATEGORIES | CODE                                      |
|---------------------------------------------|----------------------------|-------------------|-------------------------------------------|
| How old are the (HH3) females in the house? |                            |                   |                                           |
| <b>HH3a</b>                                 | 0-11 months (<1 year)      | -----Person       | <input type="text"/> <input type="text"/> |
| <b>HH3b</b>                                 | 12-23 months (1-< 2 years) | ----- Person      | <input type="text"/> <input type="text"/> |

|             |                           |              |                          |
|-------------|---------------------------|--------------|--------------------------|
| <b>HH3c</b> | 24-59 months (2-<5 years) | ----- Person | <input type="checkbox"/> |
| <b>HH3d</b> | 5 to 14 years             | ----- Person | <input type="checkbox"/> |
| <b>HH3e</b> | 15 to 19 years            | ----- Person | <input type="checkbox"/> |
| <b>HH3f</b> | 20 to 49 years            | ----- Person | <input type="checkbox"/> |
| <b>HH3g</b> | 50 years or more          | ----- Person | <input type="checkbox"/> |

**SBH: Short Birth History-MPI mortality**

*Follow this module if there is any woman of reproductive age in this household (check HH3e-HH3f)  
The purpose of the short birth history (SBH) component is to determine the number of live births to  
CURRENT members of the household and establish where these children are now.*

|              | QUESTION                                    | CODING CATEGORIES           | CODE                                   |
|--------------|---------------------------------------------|-----------------------------|----------------------------------------|
| <b>SBH1:</b> | MZ 5 eQ#ii g#a” GB Lvbvq †Kvb<br>Rb¥ n‡q‡Q? | Yes.....01<br><br>No.....02 | <input type="checkbox"/><br><br>02⇒ED1 |

**FOR INTERVIEWER USE ONLY**

*Only consider the birth of a child, if it has occurred to a **current** member of the household. (i.e. if there was a child birth in this HH, but both of the parents now live outside this HH, then do not consider it a “recent birth in the HH”. However, if a child was born to parents, who (both or either one) currently live in the HH, even though they did not live in the HH when the child was born, consider it a “recent birth in the HH”.*

*Tell the respondent:*

- I will be asking about recent births in the household.*
- I am interested in all children that were born alive.*

*Ask the following questions:*

|              |                                                                            |                         |
|--------------|----------------------------------------------------------------------------|-------------------------|
| <b>SBH2:</b> | How many live births have there been in the household in the last 5 years? | R# <input type="text"/> |
|--------------|----------------------------------------------------------------------------|-------------------------|

*Complete this table for live births to current members of the household in the last 5 years.*

| No       | Rb# Zvwil     |      | Where are they now? |
|----------|---------------|------|---------------------|
|          | Name of Month | Year | 1= Alive 2=dead     |
| <b>1</b> |               |      | _                   |
| <b>2</b> |               |      | _                   |
| <b>3</b> |               |      | _                   |
| <b>4</b> |               |      | _                   |
| <b>5</b> |               |      | _                   |
| <b>6</b> |               |      | _                   |

|                                                                                                                                 | QUESTION                               | CODING CATEGORIES       | CODE                 |
|---------------------------------------------------------------------------------------------------------------------------------|----------------------------------------|-------------------------|----------------------|
| <b>FOR INTERVIEWER USE ONLY</b>                                                                                                 |                                        |                         |                      |
| <i>If any response in the table above shows that a child has died then record a <b>Yes</b> here, otherwise record <b>No</b></i> |                                        |                         |                      |
| <b>D1:</b>                                                                                                                      | <i>A recently born child had died?</i> | Yes.....01<br>No.....02 | <input type="text"/> |

**ED: Schooling**

|            | QUESTION                                                                  | CODING CATEGORIES       | CODE                 |
|------------|---------------------------------------------------------------------------|-------------------------|----------------------|
| <b>ED1</b> | Does any <u>other</u> household member have 5 or more years of schooling? | Yes.....01<br>No.....02 | <input type="text"/> |

|            |                                                                                                    |                         |                                                   |
|------------|----------------------------------------------------------------------------------------------------|-------------------------|---------------------------------------------------|
|            | <i>If there is no child in the HH aged between 5 and 14 years (check HH2d and HH3d) skip to M1</i> |                         |                                                   |
| <b>ED2</b> | Is there any child in the HH aged between 5 & 14 years who does <u>not</u> attend school?          | Yes.....01<br>No.....02 | <input type="checkbox"/> <input type="checkbox"/> |

**M: MPI assets data**

In this section I will ask about the assets of the household and questions about where you get your water and what kind of latrine do you use.

|      | QUESTION                                                                                                                                                                                                     | CODING CATEGORIES       | CODE                                              |
|------|--------------------------------------------------------------------------------------------------------------------------------------------------------------------------------------------------------------|-------------------------|---------------------------------------------------|
| M1:  | Does your household have electricity?                                                                                                                                                                        | Yes.....01<br>No.....02 | <input type="checkbox"/> <input type="checkbox"/> |
|      | QUESTION                                                                                                                                                                                                     | CODING CATEGORIES       | CODE                                              |
| M2:  | What fuels does your household use for cooking?<br><i>Multiple responses allowed.</i><br><i>Allow respondent to respond freely, and then prompt "Anything else?" Do not specify the fuels from the list.</i> |                         |                                                   |
| M2a: | Electricity<br>If the response is yes but the response to M1 was no then check M1 again with the respondent.                                                                                                 | Yes.....01<br>No.....02 | <input type="checkbox"/> <input type="checkbox"/> |
| M2b: | Gas/LP Gas                                                                                                                                                                                                   | Yes.....01<br>No.....02 | <input type="checkbox"/> <input type="checkbox"/> |
| M2c: | Kerosene                                                                                                                                                                                                     | Yes.....01<br>No.....02 | <input type="checkbox"/> <input type="checkbox"/> |
| M2d: | Coal / lignite                                                                                                                                                                                               | Yes.....01<br>No.....02 | <input type="checkbox"/> <input type="checkbox"/> |
| M2e: | Charcoal                                                                                                                                                                                                     | Yes.....01<br>No.....02 | <input type="checkbox"/> <input type="checkbox"/> |
| M2f: | Wood                                                                                                                                                                                                         | Yes.....01<br>No.....02 | <input type="checkbox"/> <input type="checkbox"/> |
| M2g: | Straw / shrubs / grass / crop residue                                                                                                                                                                        | Yes.....01<br>No.....02 | <input type="checkbox"/> <input type="checkbox"/> |
| M2h: | Animal dung                                                                                                                                                                                                  | Yes.....01<br>No.....02 | <input type="checkbox"/> <input type="checkbox"/> |
| M2i: | Biogas                                                                                                                                                                                                       | Yes.....01<br>No.....02 | <input type="checkbox"/> <input type="checkbox"/> |
| M2j: | Others (Please specify)                                                                                                                                                                                      | Yes.....01<br>No.....02 | <input type="checkbox"/> <input type="checkbox"/> |

|             |                                                                                                                                                                                         |                         |                                                   |
|-------------|-----------------------------------------------------------------------------------------------------------------------------------------------------------------------------------------|-------------------------|---------------------------------------------------|
|             |                                                                                                                                                                                         |                         |                                                   |
| <b>M3 :</b> | <p>What is the main material of the floor of the dwelling?<br/> <i>Record the main material of the floor of the dwelling from observation. If not possible then ask respondent.</i></p> |                         |                                                   |
| M3a:        | Dirt / earth / sand / dung / mixed                                                                                                                                                      | Yes.....01<br>No.....02 | <input type="checkbox"/> <input type="checkbox"/> |
| M3b:        | Wood/Bamboo                                                                                                                                                                             | Yes.....01<br>No.....02 | <input type="checkbox"/> <input type="checkbox"/> |
| M3c:        | Brick-cement/tiles                                                                                                                                                                      | Yes.....01<br>No.....02 | <input type="checkbox"/> <input type="checkbox"/> |
| <b>M4:</b>  | <p>Does your household have...?<br/> <i>Read and prompt for each item. Record <u>all</u> items owned by household</i></p>                                                               |                         |                                                   |
| M4a:        | A radio?                                                                                                                                                                                | Yes.....01<br>No.....02 | <input type="checkbox"/> <input type="checkbox"/> |
| M4b:        | A television?                                                                                                                                                                           | Yes.....01<br>No.....02 | <input type="checkbox"/> <input type="checkbox"/> |
| M4c:        | A Refreegerator television?                                                                                                                                                             | Yes.....01<br>No.....02 | <input type="checkbox"/> <input type="checkbox"/> |
| M4d:        | A cassette/CD player?                                                                                                                                                                   | Yes.....01<br>No.....02 | <input type="checkbox"/> <input type="checkbox"/> |
| M4e:        | A mobile or non-mobile telephone?                                                                                                                                                       | Yes.....01<br>No.....02 | <input type="checkbox"/> <input type="checkbox"/> |



|      |                                            |                         |                                                   |
|------|--------------------------------------------|-------------------------|---------------------------------------------------|
| M4f: | A motorcycle/ scooter/Auto-rickshaw (CNG)? | Yes.....01<br>No.....02 | <input type="checkbox"/> <input type="checkbox"/> |
| M4g: | A rickshaw/van/bicycle?                    | Yes.....01<br>No.....02 | <input type="checkbox"/> <input type="checkbox"/> |
| M4h: | A motor rickshaw/ Easy-bike?               | Yes.....01<br>No.....02 | <input type="checkbox"/> <input type="checkbox"/> |
| M4i: | Car/ Truck/Tractor?                        | Yes.....01<br>No.....02 | <input type="checkbox"/> <input type="checkbox"/> |
| M4k: | A boat with motor?                         | Yes.....01<br>No.....02 | <input type="checkbox"/> <input type="checkbox"/> |
| M4l: | A cow/goat/hen/duck?                       | Yes.....01<br>No.....02 | <input type="checkbox"/> <input type="checkbox"/> |
| M4m: | A computer/laptop?                         | Yes.....01<br>No.....02 | <input type="checkbox"/> <input type="checkbox"/> |

**W: Water, Sanitation and Hygiene (WASH)**

|             | QUESTION                                                                              | CODING CATEGORIES | CODE |
|-------------|---------------------------------------------------------------------------------------|-------------------|------|
| <b>W1 :</b> | What is the main source of your drinking water? ( <i>enter <u>one</u> code only</i> ) |                   |      |
| W1a:        | Piped water into dwelling                                                             |                   | 01   |
| W1b:        | Piped water into yard/plot/compound                                                   |                   | 02   |
| W1c:        | Public tap/standpipe                                                                  |                   | 03   |
| W1d:        | Tube-well/borehole                                                                    |                   | 04   |
| W1e:        | Protected dug well/spring                                                             |                   | 05   |
| W1f:        | Rainwater collection system                                                           |                   | 06   |
| W1g:        | Bottled water/20L container                                                           |                   | 07   |
| W1h:        | Unprotected dug well/spring                                                           |                   | 08   |
| W1i:        | Cart wirth small tank or drum                                                         |                   | 09   |
| W1j:        | Tanker truck                                                                          |                   | 10   |
| W1K:        | Surface water<br>(river/dam/lake/pond/stream/canal/irrigation)                        |                   | 11   |
| W1l:        | Others (please specify)<br>.....                                                      |                   | 77   |

|                                            |                                                                                                                                                                                                                  |  |    |
|--------------------------------------------|------------------------------------------------------------------------------------------------------------------------------------------------------------------------------------------------------------------|--|----|
| <b>W2 :</b>                                | What do you usually do to the water to make it safer to drink?<br><i>(Do not prompt. Enter one code only)</i>                                                                                                    |  |    |
| W2a:                                       | Boil                                                                                                                                                                                                             |  | 01 |
| W2b:                                       | Add bleach/chlorine tablet/Potash Alum                                                                                                                                                                           |  | 02 |
| W2c:                                       | Water filter (Ceramic/gravel/sand)                                                                                                                                                                               |  | 03 |
| W2d:                                       | Solar disinfectant                                                                                                                                                                                               |  | 04 |
| W2e:                                       | Strain it through a cloth only                                                                                                                                                                                   |  | 05 |
| W2f:                                       | Let it stand and settle only                                                                                                                                                                                     |  | 06 |
| W2g:                                       | Nothing                                                                                                                                                                                                          |  | 07 |
| W2h:                                       | Others (Please specify)<br>.....                                                                                                                                                                                 |  | 77 |
| W2i:                                       | Don't know                                                                                                                                                                                                       |  | 99 |
| <b>W3 :</b>                                | What kind of toilet facility do members of your household usually use?<br><i>In case the respondent is unable to tell the type of toilet, ask for permission to observe it if possible (Enter one code only)</i> |  |    |
| Flush/ Pour flush System, that flushes to: |                                                                                                                                                                                                                  |  |    |
| W3a:                                       | Piped sewer system                                                                                                                                                                                               |  | 01 |
| W3b:                                       | Septic tank                                                                                                                                                                                                      |  | 02 |
| W3c:                                       | Pit latrine with water seal                                                                                                                                                                                      |  | 03 |
| W3d:                                       | Somewhere else                                                                                                                                                                                                   |  | 04 |
| W3e:                                       | Don't know where                                                                                                                                                                                                 |  | 05 |
| Pit latrine (without water seal)           |                                                                                                                                                                                                                  |  |    |
| W3f:                                       | Ventilated Improved Pit                                                                                                                                                                                          |  | 06 |
| W3g:                                       | Pit latrine with slab without water-seal                                                                                                                                                                         |  | 07 |
| W3h:                                       | Pit latrine without slab and water-seal                                                                                                                                                                          |  | 08 |
| W3i:                                       | Composting latrine                                                                                                                                                                                               |  | 09 |
| W3j:                                       | Bucket latrine                                                                                                                                                                                                   |  | 10 |
| W3k:                                       | Hanging Latrine                                                                                                                                                                                                  |  | 11 |
| W3l:                                       | No facilities/bush/field                                                                                                                                                                                         |  | 12 |
| W3m:                                       | Others (please specify)<br>.....                                                                                                                                                                                 |  | 77 |

|                                                                                                                                             |                                                                                                                                                                                    |                         |                                                   |
|---------------------------------------------------------------------------------------------------------------------------------------------|------------------------------------------------------------------------------------------------------------------------------------------------------------------------------------|-------------------------|---------------------------------------------------|
|                                                                                                                                             |                                                                                                                                                                                    |                         | ⇒W5                                               |
| <b>W4:</b>                                                                                                                                  | Do you share this facility with other households?                                                                                                                                  | Yes.....01<br>No.....02 | <input type="checkbox"/> <input type="checkbox"/> |
| <p><i>If there is a child under 2 years in the household, (Check answer to Question HH2a-HH2c and HH3a-HH3c) ask W5. If not GOTO W6</i></p> |                                                                                                                                                                                    |                         |                                                   |
| <b>W5 :</b>                                                                                                                                 | <p>The <b>last time</b> the child under 2 years old passed stools, what was done to dispose of the stools? (<i>Do not prompt</i>)<br/>(Enter <b>one</b> code only)</p>             |                         |                                                   |
| W5a:                                                                                                                                        | Child used toilet/latrine                                                                                                                                                          | 01                      | <input type="checkbox"/> <input type="checkbox"/> |
| W5b:                                                                                                                                        | Put into toilet/latrine                                                                                                                                                            | 02                      |                                                   |
| W5c:                                                                                                                                        | Put into drain/ditch                                                                                                                                                               | 03                      |                                                   |
| W5d:                                                                                                                                        | Thrown into garbage                                                                                                                                                                | 04                      |                                                   |
| W5e:                                                                                                                                        | Nothing/left it open                                                                                                                                                               | 05                      |                                                   |
| W5f:                                                                                                                                        | Don't know                                                                                                                                                                         | 99                      |                                                   |
| <b>W6:</b>                                                                                                                                  | <p>Please tell me all of the occasions when it is important for you to wash hands <u>with soap</u><br/><i>Do not prompt, Probe 'Anything Else?'</i> Enter all codes that apply</p> |                         |                                                   |
| W6a:                                                                                                                                        | Before Eating                                                                                                                                                                      | Yes.....01<br>No.....02 | <input type="checkbox"/> <input type="checkbox"/> |
| W6b:                                                                                                                                        | Before feeding a child                                                                                                                                                             | Yes.....01<br>No.....02 | <input type="checkbox"/> <input type="checkbox"/> |
| W6c:                                                                                                                                        | Before cooking/preparing food                                                                                                                                                      | Yes.....01<br>No.....02 | <input type="checkbox"/> <input type="checkbox"/> |
| W6d:                                                                                                                                        | After defecation/urination                                                                                                                                                         | Yes.....01<br>No.....02 | <input type="checkbox"/> <input type="checkbox"/> |
| W6e:                                                                                                                                        | After cleaning a child that has defecated/changing nappies/washing diaper                                                                                                          | Yes.....01<br>No.....02 | <input type="checkbox"/> <input type="checkbox"/> |

|      |                                  |                         |                      |
|------|----------------------------------|-------------------------|----------------------|
| W6f: | Others (please specify)<br>..... | Yes.....01<br>No.....02 | <input type="text"/> |
| W6g: | Don't know/No answers given      | Yes.....01<br>No.....02 | <input type="text"/> |

**H: Household hunger scale (food security)**

The following questions are to determine whether your household or you have experienced any shortage of food in the past month.

***For interviewer use only***

*In general:*  
 00 = never  
 01 = Rarely = (1 to 2 times)  
 02 = Sometimes = (3 to 10 times)  
 03 = Often = (more than 10 times)

*You may need to probe beyond the initial answer to determine which of the above categories to record.*

**H1:** How many times in the **last month** was there ever no food to eat of any kind in your house because of lack of resources to get food?      |\_\_|\_\_|  
*(if none put '00')*

**H2:** How many times in the **last month** did you personally go to sleep at night hungry because there was not enough food?      |\_\_|\_\_|  
*(if none put '00')*

**H3:** How many times in the **last month** did you personally go a whole day and night without eating anything at all because there was not enough food?      |\_\_|\_\_| *(if none put '00')*

### NUT: Nutrition data Women of Reproductive Age (WRA)

**BOX 1 - FOR INTERVIEWER AND SUPERVISOR USE ONLY**

**WRA:** Number of women 15-49 years of age living in this household? |\_\_| If 0 GOTO AP1  
(Calculate from **HH3e** and **HH3f**)

Is the interviewee a woman of reproductive age? Yes = 1, No= 2 |\_\_|

*IF THE INTERVIEWEE IS A WRA THEN REQUEST WHETHER YOU MAY TAKE A MEASUREMENT OF THEIR LEFT UPPER ARM CIRCUMFERENCE TO PROVIDE SOME ASSESSMENT OF THEIR NUTRITIONAL STATUS*

*If the interviewee is not a wra, check box 1 to see if any wra in the household, ask if they are present and request whether you may take a measurement of their left upper arm circumference to provide some assessment of their nutritional status*

**NUT:** Age of selected woman in years (check this is 15-49 years) |\_\_|\_\_|  
Enter 77 if no WRA consents to the measurement

MUAC on the left arm (1st time) |\_\_|\_\_|.|\_\_|  
cm

MUAC on the left arm (2nd time) |\_\_|\_\_|.|\_\_|  
cm

Enter:

77.7 if MUAC too big (MUAC tape does not fit)

Record in what condition the MUAC was measured (place tick)

Bare skin |\_\_|

Clothing (thin) |\_\_|

Clothing |\_\_|

(thick)

Bangles |\_\_|

*IF MUAC < 21.0 CM → REFER TO A HEALTH FACILITY.*

### IODINE AND IODISED SALT-BANGLADESH

**AP: Awareness and practices related to IDD and iodized salt**

|  | QUESTION | CODING CATEGORIES | CODE |
|--|----------|-------------------|------|
|--|----------|-------------------|------|

|              |                                                                                                                                                                                                                                                                            |                         |                                                               |
|--------------|----------------------------------------------------------------------------------------------------------------------------------------------------------------------------------------------------------------------------------------------------------------------------|-------------------------|---------------------------------------------------------------|
| <b>AP1.</b>  | Have you ever heard of iodine as part of nutrient?                                                                                                                                                                                                                         | Yes.....01<br>No.....02 | <input type="checkbox"/> <input type="checkbox"/><br>02 ⇒ AP5 |
| <b>AP2.</b>  | Do you know what problems one might have if s/he has iodine deficiency?<br>(Multiple responses possible)<br>(Do not read responses, respond for <b>All</b> that are mentioned then return and complete “2” when the respondent confirms that they have no more responses.) |                         |                                                               |
| <b>AP2.a</b> | Development of Goitre                                                                                                                                                                                                                                                      | Yes.....01<br>No.....02 | <input type="checkbox"/> <input type="checkbox"/>             |
| <b>AP2.b</b> | Chance of complication during delivery/increases chance of miscarriage and stillbirth                                                                                                                                                                                      | Yes.....01<br>No.....02 | <input type="checkbox"/> <input type="checkbox"/>             |
| <b>AP2.c</b> | Hampers growth in neonates/children                                                                                                                                                                                                                                        | Yes.....01<br>No.....02 | <input type="checkbox"/> <input type="checkbox"/>             |
| <b>AP2.d</b> | Reduces child intelligence/<br>Intellectual development                                                                                                                                                                                                                    | Yes.....01<br>No.....02 | <input type="checkbox"/> <input type="checkbox"/>             |
| <b>AP2.e</b> | Hampers health in adolescents/adults                                                                                                                                                                                                                                       | Yes.....01<br>No.....02 | <input type="checkbox"/> <input type="checkbox"/>             |
| <b>AP2.f</b> | Hampers normal brain development                                                                                                                                                                                                                                           | Yes.....01<br>No.....02 | <input type="checkbox"/> <input type="checkbox"/>             |
| <b>AP2.g</b> | Development of Cretinism                                                                                                                                                                                                                                                   | Yes.....01<br>No.....02 | <input type="checkbox"/> <input type="checkbox"/>             |
| <b>AP2.h</b> | Others (please specify)                                                                                                                                                                                                                                                    | Yes.....01<br>No.....02 | <input type="checkbox"/> <input type="checkbox"/>             |
| <b>AP2.i</b> | Don't know any answers                                                                                                                                                                                                                                                     | Yes.....01<br>No.....02 | <input type="checkbox"/> <input type="checkbox"/>             |
| <b>AP3.</b>  | Do you know of any method to prevent iodine deficiency?                                                                                                                                                                                                                    | Yes.....01<br>No.....02 | <input type="checkbox"/> <input type="checkbox"/>             |

|              |                                                                                                                                                                                                                                                       |                                                                                                                                                  |                                                                |
|--------------|-------------------------------------------------------------------------------------------------------------------------------------------------------------------------------------------------------------------------------------------------------|--------------------------------------------------------------------------------------------------------------------------------------------------|----------------------------------------------------------------|
|              |                                                                                                                                                                                                                                                       |                                                                                                                                                  | 02 ⇨ AP5                                                       |
| <b>AP4.</b>  | Please state the <u>most important</u> way to prevent iodine deficiency                                                                                                                                                                               | Use iodised salt.....01<br>Take iodine supplements.....02<br>Eat seafood/seaweed .....03<br>Other (Please specify) .....077<br>Don't Know.....99 | <input type="checkbox"/> <input type="checkbox"/>              |
| <b>AP5.</b>  | Have you heard about iodized salt?                                                                                                                                                                                                                    | Yes.....01<br>No.....02                                                                                                                          | <input type="checkbox"/> <input type="checkbox"/><br>02 ⇨ AP12 |
| <b>AP6:</b>  | Where have you heard about iodized salt?<br><i>(Multiple responses possible. Do not prompt, probe "Anything else?" Respond for All that are mentioned then return and complete "2" when the respondent confirms that they have no more responses)</i> |                                                                                                                                                  |                                                                |
| <b>AP6.a</b> | Television                                                                                                                                                                                                                                            | Yes.....01<br>No.....02                                                                                                                          | <input type="checkbox"/> <input type="checkbox"/>              |
| <b>AP6.b</b> | Radio                                                                                                                                                                                                                                                 | Yes.....01<br>No.....02                                                                                                                          | <input type="checkbox"/> <input type="checkbox"/>              |
| <b>AP6.c</b> | Newspaper                                                                                                                                                                                                                                             | Yes.....01<br>No.....02                                                                                                                          | <input type="checkbox"/> <input type="checkbox"/>              |
| <b>AP6.d</b> | Poster/Leaflet                                                                                                                                                                                                                                        | Yes.....01<br>No.....02                                                                                                                          | <input type="checkbox"/> <input type="checkbox"/>              |
| <b>AP6.e</b> | Doctor/ Health worker/<br>NGO worker                                                                                                                                                                                                                  | Yes.....01<br>No.....02                                                                                                                          | <input type="checkbox"/> <input type="checkbox"/>              |
| <b>AP6.f</b> | Relatives                                                                                                                                                                                                                                             | Yes.....01<br>No.....02                                                                                                                          | <input type="checkbox"/> <input type="checkbox"/>              |
| <b>AP6.g</b> | Friend/Neighbour                                                                                                                                                                                                                                      | Yes.....01<br>No.....02                                                                                                                          | <input type="checkbox"/> <input type="checkbox"/>              |

|              |                                                                                                      |                                                                                                                                                              |                                                                            |
|--------------|------------------------------------------------------------------------------------------------------|--------------------------------------------------------------------------------------------------------------------------------------------------------------|----------------------------------------------------------------------------|
| <b>AP6.h</b> | teacher/School                                                                                       | Yes.....01<br>No.....02                                                                                                                                      | <input type="checkbox"/> <input type="checkbox"/>                          |
| <b>AP6.i</b> | Shopkeeper                                                                                           | Yes.....01<br>No.....02                                                                                                                                      | <input type="checkbox"/> <input type="checkbox"/>                          |
| <b>AP6.j</b> | Others ()                                                                                            | Yes.....01<br>No.....02                                                                                                                                      | <input type="checkbox"/> <input type="checkbox"/>                          |
| <b>AP7</b>   | Do you think, one can prevent iodine deficiency only by consuming iodized salt?                      | Yes.....01<br>No.....02<br><br>It depends on the severity of deficiency ..... 03<br>Don't know.....99                                                        | <input type="checkbox"/> <input type="checkbox"/><br><br>01⇒ AP9<br>99⇒AP9 |
| <b>AP8</b>   | If no or "it depends", then what is the most important reason behind this?<br><i>(Do not prompt)</i> | It is not possible to get adequate iodine from salt.....01<br>It is harmful for health to consume excess table salt.....02<br>Others (Please specify).....03 | <input type="checkbox"/> <input type="checkbox"/>                          |
| <b>AP9</b>   | Do you use iodized salt for cooking in your household?                                               | Yes.....01<br>No.....02<br>Don't know.....99                                                                                                                 | <br><br>02⇒ AP11<br>99⇒AP12                                                |



|                                                          |                                                                                                                                                                                                                    |                                                                                                                                                                                                                                                                                                                                                               |                                                                          |                                                               |
|----------------------------------------------------------|--------------------------------------------------------------------------------------------------------------------------------------------------------------------------------------------------------------------|---------------------------------------------------------------------------------------------------------------------------------------------------------------------------------------------------------------------------------------------------------------------------------------------------------------------------------------------------------------|--------------------------------------------------------------------------|---------------------------------------------------------------|
| <b>AP10</b>                                              | <p>If yes, what is the most important cause for doing this?</p> <p><i>(Do not read responses. Select one option only. If more than one response is given please probe to find the most important reason)</i></p>   | <p>Consuming iodized salt is good for health .....01<br/>         No other type of salt is available.....02<br/>         Advised by doctor.....03<br/>         Suggested by shopkeeper .....04<br/>         Advised by relatives/friend/neighbour .....05<br/>         Inspired by TV/radio/Newspaper.....06<br/>         Others (please specify) .....77</p> |                                                                          | <input type="checkbox"/> <input type="checkbox"/>             |
| <p>If Ans to <b>AP9</b> is 01, then skip <b>AP11</b></p> |                                                                                                                                                                                                                    |                                                                                                                                                                                                                                                                                                                                                               |                                                                          |                                                               |
| <b>AP11</b>                                              | <p>If not, what is the most important cause for not doing so?</p> <p><i>(Do not read responses. Select one option only. If more than one response is given please probe to find the most important reason)</i></p> | <p>Not readily available.....01<br/>         More expensive than non-iodised.....02<br/>         I/household members don't like the taste .....03<br/>         Not always available in small quantities .....04<br/>         Others (please specify).....077<br/>         Don't Know.....99</p>                                                               |                                                                          | <input type="checkbox"/> <input type="checkbox"/>             |
| <b>AP12</b>                                              | <p>Do you or any of your household members use table salt?</p>                                                                                                                                                     | <p>Yes.....01<br/>         No.....02</p>                                                                                                                                                                                                                                                                                                                      |                                                                          | <input type="checkbox"/> <input type="checkbox"/><br>02⇒ AP15 |
| <b>AP13</b>                                              | <p>If yes, please confirm which members used table salt in the past week?</p>                                                                                                                                      | <p>Age</p> <p>&lt;5 years</p> <p>5-14 years</p> <p>15-19 years</p> <p>20-49 years</p>                                                                                                                                                                                                                                                                         | <p>Number of household members<br/> <i>(Record from HH2 and HH3)</i></p> | <p>Number of members using table salt</p>                     |

|             |                                                                                                 |                                                                                                             |                                                                                                                                  |  |
|-------------|-------------------------------------------------------------------------------------------------|-------------------------------------------------------------------------------------------------------------|----------------------------------------------------------------------------------------------------------------------------------|--|
|             |                                                                                                 | 50 years or more                                                                                            |                                                                                                                                  |  |
| <b>AP14</b> | Do you use iodized salt as table salt in your household?                                        | Yes.....01<br>No.....02<br>Don't know.....99                                                                | <input type="checkbox"/> <input type="checkbox"/>                                                                                |  |
| <b>AP15</b> | Is there any member in your household who has delayed mental development?                       | Yes.....01<br>No.....02                                                                                     | <input type="checkbox"/> <input type="checkbox"/><br>02 ⇒ AP17                                                                   |  |
| <b>AP16</b> | How many members are there and please mention their age                                         | Serial no                                                                                                   | Age                                                                                                                              |  |
|             |                                                                                                 | 1                                                                                                           |                                                                                                                                  |  |
|             |                                                                                                 | 2                                                                                                           |                                                                                                                                  |  |
|             |                                                                                                 | 3                                                                                                           |                                                                                                                                  |  |
| <b>AP17</b> | Is there any member in your household who has goitre?                                           | Yes.....01<br>No.....02                                                                                     | <input type="checkbox"/><br>02 ⇒ AP19                                                                                            |  |
| <b>AP18</b> | How many members are there and please mention their age                                         | Serial no                                                                                                   | Age                                                                                                                              |  |
|             |                                                                                                 |                                                                                                             |                                                                                                                                  |  |
|             |                                                                                                 |                                                                                                             |                                                                                                                                  |  |
|             |                                                                                                 |                                                                                                             |                                                                                                                                  |  |
| <b>AP19</b> | Do you know that there is a "salt law"?                                                         | Yes.....01<br>No.....02<br>Don't know .....99                                                               | <input type="checkbox"/> <input type="checkbox"/><br>02 ⇒ AP21<br>99 ⇒ AP21                                                      |  |
| <b>AP20</b> | Do you know whether there is any punishment for violating this law for retailers/manufacturers? | Yes.....01<br>No.....02<br>Don't know.....99                                                                | <input type="checkbox"/> <input type="checkbox"/>                                                                                |  |
| <b>AP21</b> | Do you know whether salt can be tested for iodine?                                              | Yes.....01<br>No.....02                                                                                     | <br>02 ⇒ AP26                                                                                                                    |  |
| <b>AP22</b> | If yes, please state the methods of testing salt for iodine                                     | With home ingredients .....01<br>With testing kit/any chemicals .....02<br>Both.....03<br>Don't know.....99 | <input type="checkbox"/> <input type="checkbox"/><br>02 ⇒ AP24<br>99 ⇒ AP26<br><input type="checkbox"/> <input type="checkbox"/> |  |

|               |                                                                    |                                                                                                                                   |                                                             |
|---------------|--------------------------------------------------------------------|-----------------------------------------------------------------------------------------------------------------------------------|-------------------------------------------------------------|
|               |                                                                    |                                                                                                                                   |                                                             |
| <b>AP23</b>   | What are the ingredients required for testing salt iodine at home? |                                                                                                                                   |                                                             |
| <b>AP23.a</b> | Salt                                                               | Mentioned.....01<br>Did not mention.....02                                                                                        | <input type="text"/> <input type="text"/><br>02 ⇒<br>AP23.c |
| <b>AP23.b</b> | How much Salt                                                      | Pinch amount.....01<br>Tea spoon full.....02<br>Others (please specify).....77<br><hr/> Dont know.....99<br>Not applicable.....88 | <input type="text"/> <input type="text"/>                   |
| <b>AP23.c</b> | Cooked rice                                                        | Mentioned.....01<br>Did not mention.....02                                                                                        | <input type="text"/> <input type="text"/><br>02 ⇒<br>AP23.e |
| <b>AP23.d</b> | How much Cooked rice?                                              | Small amount.....01<br>5 grains.....02<br>Others (please specify).....77<br><hr/> Don't know.....99<br>Not applicable.....88      | <input type="text"/> <input type="text"/>                   |
| <b>AP23.e</b> | Lemon juice                                                        | Mentioned<br>.....01<br>Did not mention.....02                                                                                    | <input type="text"/> <input type="text"/><br>02 ⇒ AP24      |
| <b>AP23.f</b> | How much Lemon juice?                                              | Few drops.....01<br>Others (please specify).....77<br><hr/> Don't know.....99<br>Not applicable.....88                            | <input type="text"/> <input type="text"/>                   |
| <b>AP24</b>   | What colour if salt contains iodine?                               | Colour does not change<br>.....01<br>Blue..... 02<br>Violet.....03<br>Others (please<br>specify).....77                           | <input type="text"/> <input type="text"/>                   |
| <b>AP25</b>   | What colour if salt does not contain iodine?                       | Colour does not change<br>.....01<br>Blue..... 02                                                                                 | <input type="text"/> <input type="text"/>                   |

|             |                                                                                                      |                                                    |                                                   |
|-------------|------------------------------------------------------------------------------------------------------|----------------------------------------------------|---------------------------------------------------|
|             |                                                                                                      | Violet.....03<br>Others (please<br>specify).....77 |                                                   |
| <b>AP26</b> | Did you ever see salt being tested<br>by government people in place<br>where you buy your salt from? | Yes.....01<br>No.....02<br>Don't know.....99       | <input type="checkbox"/> <input type="checkbox"/> |

**IS: Use of iodized salt**

We would like to ask some questions about the salt most commonly used in your household and to take a sample for laboratory testing to see if it is iodized. Please answer all questions below in relation to the salt most commonly used to cook meals in your household.

|                    | QUESTION                                                                                                                                                              | CODING CATEGORIES                                                                                                                     | CODE                                                    |
|--------------------|-----------------------------------------------------------------------------------------------------------------------------------------------------------------------|---------------------------------------------------------------------------------------------------------------------------------------|---------------------------------------------------------|
| <p><b>IS1.</b></p> | <p>Is the salt <u>currently used to cook meals</u> in your household in the packaging (<i>such as packets/plastic bags/tins</i>) you bought it in?</p>                | <p>Yes.....01<br/>           No.....02<br/>           No salt currently in the household .....03<br/>           Don't know.....99</p> | <p><input type="checkbox"/><input type="checkbox"/></p> |
| <p><b>IS2.</b></p> | <p><b>Was</b> the salt <u>currently used to cook meals</u> in your household bought in a sealed package</p> <p><i>(Check whether the packet is of any brand )</i></p> | <p>Yes.....01<br/>           No.....02<br/>           Don't know.....99</p>                                                           | <p><input type="checkbox"/><input type="checkbox"/></p> |

|              |                                                                                              |                                              |                                                                       |
|--------------|----------------------------------------------------------------------------------------------|----------------------------------------------|-----------------------------------------------------------------------|
| <b>IS3.</b>  | Do you know whether packaged salts have any picture/sign (label) on their packets?           | Yes.....01<br>No.....02<br>Don't know.....99 | <input type="checkbox"/> <input type="checkbox"/><br>02⇒IS6<br>99⇒IS6 |
| <b>IS4.</b>  | If yes, what are the picture/signs that are present on the packet?<br><i>(Do not prompt)</i> |                                              | <input type="checkbox"/> <input type="checkbox"/>                     |
| <b>IS4.a</b> | BSTI seal                                                                                    | Mentioned.....01<br>Did not mention.....02   | <input type="checkbox"/> <input type="checkbox"/>                     |
| <b>IS4.b</b> | Logo of “iodized salt”                                                                       | Mentioned.....01<br>Did not mention.....02   | <input type="checkbox"/> <input type="checkbox"/>                     |
| <b>IS4.c</b> | Date of manufacture                                                                          | Mentioned.....01<br>Did not mention.....02   | <input type="checkbox"/> <input type="checkbox"/>                     |
| <b>IS4.d</b> | Date of Expiry                                                                               | Mentioned.....01<br>Did not mention.....02   | <input type="checkbox"/> <input type="checkbox"/>                     |
| <b>IS4.e</b> | Weight                                                                                       | Mentioned.....01<br>Did not mention.....02   | <input type="checkbox"/> <input type="checkbox"/>                     |
| <b>IS4.f</b> | Maximum retail price                                                                         | Mentioned.....01<br>Did not mention.....02   | <input type="checkbox"/> <input type="checkbox"/>                     |
| <b>IS4.g</b> | Name of manufacture                                                                          | Mentioned.....01<br>Did not mention.....02   | <input type="checkbox"/> <input type="checkbox"/>                     |

|                      |                                                                                                                                                 |                                                                                                                              |                                                        |                          |
|----------------------|-------------------------------------------------------------------------------------------------------------------------------------------------|------------------------------------------------------------------------------------------------------------------------------|--------------------------------------------------------|--------------------------|
| <b>IS5.</b>          | <i>Please look to observe the packet of the salt and record whether the information are present on the packet</i>                               | Packet is present.....01                                                                                                     | <input type="checkbox"/>                               |                          |
|                      |                                                                                                                                                 | Packet is not present.....02                                                                                                 | <input type="checkbox"/>                               |                          |
|                      |                                                                                                                                                 |                                                                                                                              |                                                        | 02⇒IS6                   |
|                      |                                                                                                                                                 | BSTI seal                                                                                                                    | Present=1; Absent=2                                    | <input type="checkbox"/> |
|                      |                                                                                                                                                 | Logo of “iodized salt”                                                                                                       | Present=1; Absent=2                                    | <input type="checkbox"/> |
|                      |                                                                                                                                                 | Date of manufacture                                                                                                          | Present=1; Absent=2                                    | <input type="checkbox"/> |
|                      |                                                                                                                                                 | Date of Expiry                                                                                                               | Present=1; Absent=2                                    | <input type="checkbox"/> |
|                      |                                                                                                                                                 | Weight                                                                                                                       | Present=1; Absent=2                                    | <input type="checkbox"/> |
| Maximum retail price | Present=1; Absent=2                                                                                                                             | <input type="checkbox"/>                                                                                                     |                                                        |                          |
| Name of manufacturer | Present=1; Absent=2                                                                                                                             | <input type="checkbox"/>                                                                                                     |                                                        |                          |
| <b>IS6.</b>          | Where do you usually buy salts from?                                                                                                            | Retailer shops..... 01<br>Market/haat..... 02<br>Hawkers ..... 03<br>From ration.....04<br>Others (please specify.....77     | <input type="checkbox"/>                               |                          |
| <b>IS7.</b>          | When the salt <u>currently used to cook meals</u> in your household was bought, did you look for or ask for iodized salt? (labelled as iodized) | Yes.....01<br>No.....02<br>Someone else purchased the salt.....03<br>Salt was collected locally at site of production.....04 | <input type="checkbox"/><br>02⇒IS9<br>03⇒IS9<br>04⇒IS9 |                          |

|               |                                                                                                                                                                                                                                                                   |                                                                                                                                                 |                                                                                                     |
|---------------|-------------------------------------------------------------------------------------------------------------------------------------------------------------------------------------------------------------------------------------------------------------------|-------------------------------------------------------------------------------------------------------------------------------------------------|-----------------------------------------------------------------------------------------------------|
| <b>IS8</b>    | How did you know it was iodized? (label, packaged)                                                                                                                                                                                                                | Labelled as “Iodized” .....01<br>Seal of BSTI present.....02<br>Packaged.....03<br>The shopkeeper assured..... 04<br>Can’t give a reason.....05 | <input type="checkbox"/> <input type="checkbox"/>                                                   |
| <b>IS9</b>    | Do you use salt for purposes other than cooking or as table salt?<br><i>Such as food preservation, feeding livestock or cleaning purpose</i>                                                                                                                      | Yes.....01<br>No.....02                                                                                                                         | <input type="checkbox"/> <input type="checkbox"/><br>02⇒IS11                                        |
| <b>IS10</b>   | Please mention the usage of salt in our household other than for cooking, as table salt or for food preservation<br><i>Such as feeding livestock or cleaning purpose</i>                                                                                          |                                                                                                                                                 |                                                                                                     |
| <b>IS10.a</b> | For food preservation                                                                                                                                                                                                                                             | Yes.....01<br>No.....02                                                                                                                         |                                                                                                     |
| <b>IS10.b</b> | Feeding livestock/in fish farm                                                                                                                                                                                                                                    | Yes.....01<br>No.....02                                                                                                                         |                                                                                                     |
| <b>IS10.c</b> | For cleaning purpose                                                                                                                                                                                                                                              | Yes.....01<br>No.....02                                                                                                                         |                                                                                                     |
| <b>IS10.d</b> | Others (Please specify).....77                                                                                                                                                                                                                                    | Yes.....01<br>No.....02                                                                                                                         |                                                                                                     |
| <b>IS11</b>   | How much salt do you use for cooking, table salt and preservation in a month?<br><br><i>If the respondent cannot quantify accurately, seek permission to observe the salt container and ask how full it was when salt was purchased and when it was purchased</i> | ..... grams                                                                                                                                     | <input type="checkbox"/> <input type="checkbox"/> <input type="checkbox"/> <input type="checkbox"/> |



|              |                                                                                                                                                                        |                                                                                                                                                                                                                          |                                                                   |
|--------------|------------------------------------------------------------------------------------------------------------------------------------------------------------------------|--------------------------------------------------------------------------------------------------------------------------------------------------------------------------------------------------------------------------|-------------------------------------------------------------------|
| <b>IS12.</b> | On average, what quantity of salt do you buy for consumption (cooking, table salt, preserving foods)?                                                                  | <100 gms.....01<br>100-200 gms.....02<br>200-400 gms.....03<br>500 gms.....04<br>1 kg.....05<br>1-2 kgs.....06<br>2-4 kgs.....07<br>>5 kgs.....08<br>Don't know.....99                                                   | <input type="text"/> <input type="text"/>                         |
| <b>IS13.</b> | Approximately how often do you buy salt for consumption (cooking, table salt, preserving foods)?                                                                       | More than once a week .....01<br>Every week .....02<br>Two to three times a month.....03<br>Once a month .....04<br>Once in 2 to 3 months .....05<br>Once in 4 to 6 months.....06<br>Other .....077<br>Don't Know.....99 | <input type="text"/> <input type="text"/>                         |
| <b>IS14.</b> | In the past 7 days, on about how many days did you consume food in the home that was prepared using or seasoned with salt?<br><br><i>Such as pickles, fish, others</i> | No days in this period.....00<br>1 day.....01<br>2 days.....02<br>3 days .....03<br>4 days.....04<br>5 days.....05<br>6 days.....06<br>7 days.....07<br>Don't know.....99                                                | <input type="text"/> <input type="text"/><br>00 ⇒ PF3<br>99 ⇒ PF3 |
| <b>IS15.</b> | On days when you use salt, on average how many of your meals in that day are prepared or seasoned with salt?                                                           | 3 times a day.....01<br>2 times a day.....02<br>Once a day.....03<br>Don't know.....99                                                                                                                                   | <input type="text"/> <input type="text"/>                         |
| <b>IS16.</b> | How often do you consume food away from home in a week/vendor cooked food at home?                                                                                     | Everyday.....01<br>4-6 days.....02<br>1-3 days.....03<br>No days in this period.....04<br>Don't know.....99                                                                                                              | <input type="text"/> <input type="text"/>                         |



|              |                                                                                                                                                                                                                                                                          |                                                                                               |                                                                                                      |
|--------------|--------------------------------------------------------------------------------------------------------------------------------------------------------------------------------------------------------------------------------------------------------------------------|-----------------------------------------------------------------------------------------------|------------------------------------------------------------------------------------------------------|
| <b>IS20.</b> | SALT SAMPLE ID <span style="float: right;"> <input type="text" value="1"/> <input type="text"/> <input type="text"/> <input type="text"/> <input type="text"/> <input type="text"/> </span><br><br><i>Enter the PSU number after 1, followed by the household number</i> |                                                                                               |                                                                                                      |
| <b>IS21.</b> | <i>Conduct a rapid field test from a portion of the salt collected for laboratory test as described in the field manual. Enter the number that corresponds to the test outcome.</i>                                                                                      | Not iodized.....01<br>Iodized.....02<br>Salt not tested.....03<br>No salt in the home .....04 | <div style="text-align: right;"> <input type="text"/> <input type="text"/> </div> 02⇒IS24<br>03⇒IS23 |
| <b>IS22.</b> | <i>The first result was negative. Conduct the retest with recheck solution on a new salt sample, as described in the field manual. Select the code that corresponds to the test outcome.</i>                                                                             | Not iodized.....01<br>Iodized.....02<br>Salt not tested.....03                                | <div style="text-align: right;"> <input type="text"/> <input type="text"/> </div>                    |
| <b>IS23.</b> | <i>Please state the reason why the salt was not tested/re-tested</i>                                                                                                                                                                                                     | <hr/> <hr/>                                                                                   |                                                                                                      |

|               |                                                                                                                                  |                         |                                                   |
|---------------|----------------------------------------------------------------------------------------------------------------------------------|-------------------------|---------------------------------------------------|
| <b>IS24.</b>  | Please provide your valuable feedback to relevant authorities on how to increase public awareness regarding use of iodized salt. |                         |                                                   |
| <b>IS24.a</b> | To increase campaign by media                                                                                                    | Yes.....01<br>No.....02 | <input type="checkbox"/> <input type="checkbox"/> |
| <b>IS24.b</b> | Health workers should be involved more                                                                                           | Yes.....01<br>No.....02 | <input type="checkbox"/> <input type="checkbox"/> |
| <b>IS24.c</b> | These topics should be included in school curriculum                                                                             | Yes.....01<br>No.....02 | <input type="checkbox"/> <input type="checkbox"/> |
| <b>IS24.d</b> | Price should be reduced                                                                                                          | Yes.....01<br>No.....02 | <input type="checkbox"/> <input type="checkbox"/> |
| <b>IS24.e</b> | Salts should be packaged                                                                                                         | Yes.....01<br>No.....02 | <input type="checkbox"/> <input type="checkbox"/> |
| <b>IS24.f</b> | Packets should be properly labelled                                                                                              | Yes.....01<br>No.....02 | <input type="checkbox"/> <input type="checkbox"/> |
| <b>IS24.g</b> | Ensure proper dissemination of information through retailer shops and shopkeepers                                                | Yes.....01<br>No.....02 | <input type="checkbox"/> <input type="checkbox"/> |
| <b>IS24.h</b> | Raise public awareness on salt testing for iodine using home ingredients                                                         | Yes.....01<br>No.....02 | <input type="checkbox"/> <input type="checkbox"/> |
| <b>IS24.i</b> | No advice/could not give any advice                                                                                              | Yes.....01<br>No.....02 | <input type="checkbox"/> <input type="checkbox"/> |
| <b>IS24.j</b> | Others (please specify)<br>_____                                                                                                 | Yes.....01<br>No.....02 | <input type="checkbox"/> <input type="checkbox"/> |

|               |                                                                                                                                                       |                         |                                                   |
|---------------|-------------------------------------------------------------------------------------------------------------------------------------------------------|-------------------------|---------------------------------------------------|
| <b>IS25.</b>  | Please provide your valuable feedback on what steps should be taken by relevant authorities to ensure availability of quality iodized salt in market. |                         |                                                   |
| <b>IS25.a</b> | Price should be reduced                                                                                                                               | Yes.....01<br>No.....02 | <input type="checkbox"/> <input type="checkbox"/> |
| <b>IS25.b</b> | Formualte law and ensure proper implementation                                                                                                        | Yes.....01<br>No.....02 | <input type="checkbox"/> <input type="checkbox"/> |
| <b>IS25.c</b> | Raise awareness among retailers about salt law                                                                                                        | Yes.....01<br>No.....02 | <input type="checkbox"/> <input type="checkbox"/> |
| <b>IS25.d</b> | Formulate law regarding proper packaging and appropriate implementation                                                                               | Yes.....01<br>No.....02 | <input type="checkbox"/> <input type="checkbox"/> |
| <b>IS25.e</b> | No advice/could not give any advice                                                                                                                   | Yes.....01<br>No.....02 | <input type="checkbox"/> <input type="checkbox"/> |
| <b>IS25.f</b> | Others (please specify)<br>_____                                                                                                                      | Yes.....01<br>No.....02 | <input type="checkbox"/> <input type="checkbox"/> |

### FORTIFIABLE FOODS DATA

Examples of basic contact coverage questions for other fortifiable edible oil  
*Mark the relevant box with an "v"*

**FF1:** What is the main edible oil consumed by your household  
*(clarify with: the oil that you use on most days in most meals in the home)?*

|       |                                 |                                         |
|-------|---------------------------------|-----------------------------------------|
| FF1a: | Soya-bean oil                   | <input type="checkbox"/>                |
| FF1b: | Palm oil                        | <input type="checkbox"/>                |
| FF1c: | Rice-bran oil                   | <input type="checkbox"/>   ⇒ <b>FF4</b> |
| FF1d: | Sesame seed                     | <input type="checkbox"/>   ⇒ <b>FF4</b> |
| FF1e: | Groundnut oil                   | <input type="checkbox"/>   ⇒ <b>FF4</b> |
| FF1f: | Sunflower oil                   | <input type="checkbox"/>   ⇒ <b>FF4</b> |
| FF1g: | Mustard seed oil                | <input type="checkbox"/>   ⇒ <b>FF4</b> |
| FF1h: | Ghee                            | <input type="checkbox"/>   ⇒ <b>FF4</b> |
| FF1i: | Butter oil                      | <input type="checkbox"/>   ⇒ <b>FF4</b> |
| FF1j: | Don't know                      | <input type="checkbox"/>   ⇒ <b>FF4</b> |
| FF1k: | Other (Please specify)<br>..... | <input type="checkbox"/>   ⇒ <b>FF4</b> |

**FF2:** Can you tell me where you usually get this main edible oil consumed in your household from?  
*Tick one box only...*

|       |                             |                                         |
|-------|-----------------------------|-----------------------------------------|
| FF2a: | Purchased from a store      | <input type="checkbox"/>                |
| FF2b: | Made it at home             | <input type="checkbox"/>   ⇒ <b>FF4</b> |
| FF2c: | Food aid                    | <input type="checkbox"/>   ⇒ <b>FF4</b> |
| FF2d: | Don't know                  | <input type="checkbox"/>   ⇒ <b>FF4</b> |
| FF2e: | Other (Please specify)..... | <input type="checkbox"/>   ⇒ <b>FF4</b> |

**FF3:** Can you tell me the brand? *Tick **one** box only...*

**1. (Soybean oil)**

|       |                             |                          |
|-------|-----------------------------|--------------------------|
| FF3a: | Unbranded                   | <input type="checkbox"/> |
| FF3b: | Rupchanda                   | <input type="checkbox"/> |
| FF3c: | Fresh                       | <input type="checkbox"/> |
| FF3d: | Teer                        | <input type="checkbox"/> |
| FF3e: | Pushti                      | <input type="checkbox"/> |
| FF3f: | Sun                         | <input type="checkbox"/> |
| FF3g: | Veola                       | <input type="checkbox"/> |
| FF3h: | Morog                       | <input type="checkbox"/> |
| FF3i: | Mostofa                     | <input type="checkbox"/> |
| FF3j: | Other (Please specify)..... | <input type="checkbox"/> |

|       |                               |                          |
|-------|-------------------------------|--------------------------|
| FF3k: | Could not remember brand name | <input type="checkbox"/> |
|-------|-------------------------------|--------------------------|

**2. (Palm oil)**

|       |                               |   |
|-------|-------------------------------|---|
| FF3l: | Unbranded                     | _ |
| FF3m: | Meizan                        | _ |
| FF3n: | Lucky                         | _ |
| FF3o: | Fresh                         | _ |
| FF3p: | Family                        | _ |
| FF3q: | Hilsha                        | _ |
| FF3r: | Nurjahan                      | _ |
| FF3s: | Morog                         | _ |
| FF3t: | Mostofa                       | _ |
| FF3u: | Other (Please specify).....   | _ |
| FF3v: | Could not remember brand name | _ |

**FF4:** For the most recent major purchase of (main oil type from above)

What was the quantity? |\_|\_|\_|\_|ml

*Use photos of typical quantities (in plastic bags/bottles) and their grams equivalents to determine the quantity if possible.*

**FF5:** How long does this amount usually last in your household (complete days)?

Number of days: |\_|\_|\_|

**Thank the respondent, end the interview and check back that all answers are complete before leaving the household.**

**Field Notes:**



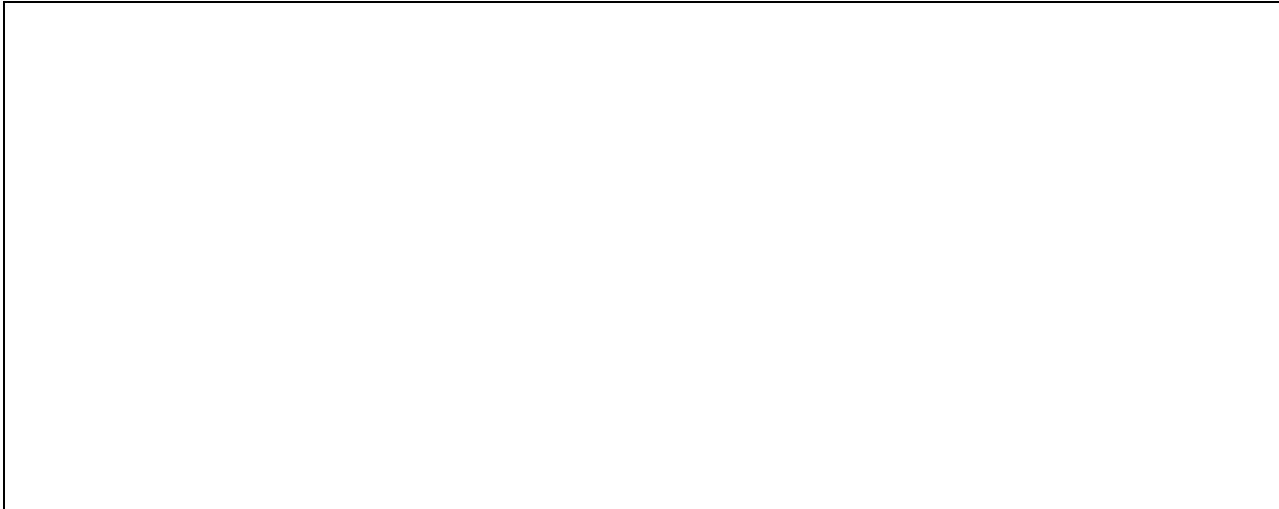

Signature of the interviewer

Code 

|  |  |  |
|--|--|--|
|  |  |  |
|--|--|--|

Signature of the quality controller

Code 

|  |  |  |
|--|--|--|
|  |  |  |
|--|--|--|
